# Supplementary material
Source: ML conference proceedings conference paper supplement (https://openreview.net/forum?id=bEKo5bsV77U)

exact

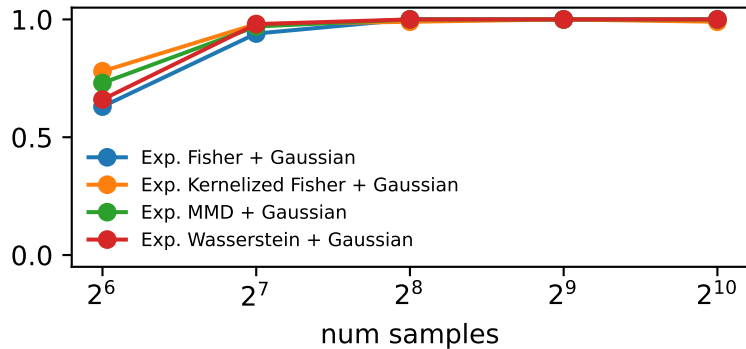

approximate

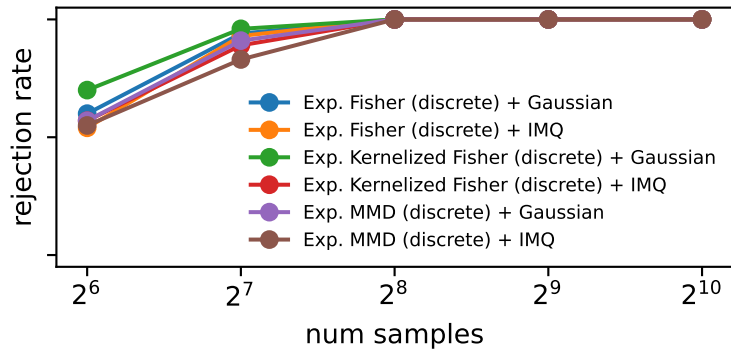

Supplement: supplementary_material [file attachment]

exact

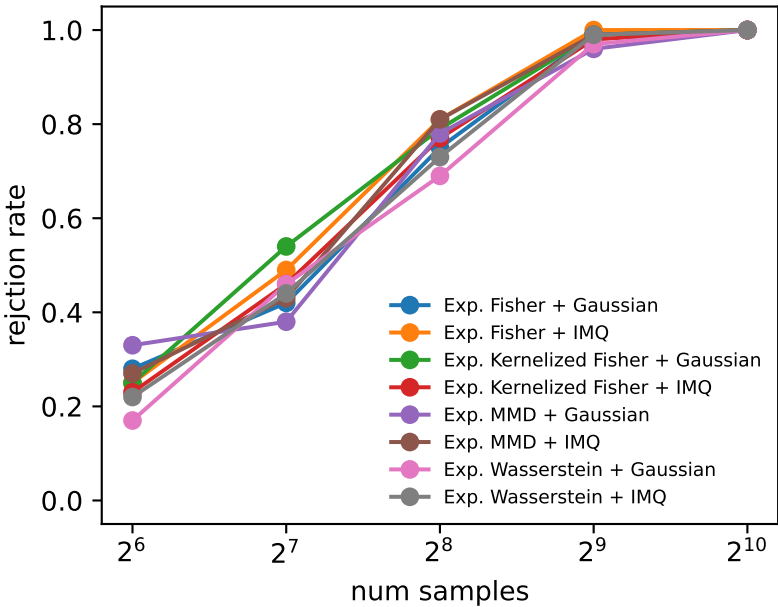

approximate

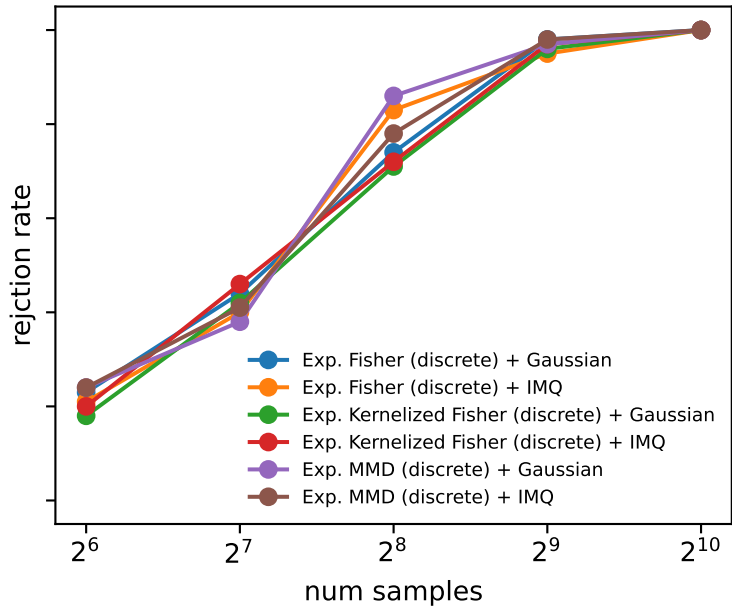

Supplement: supplementary_material [file attachment]

exact

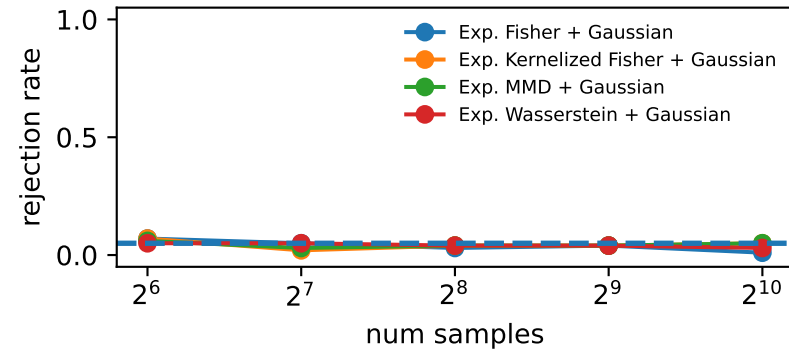

approximate

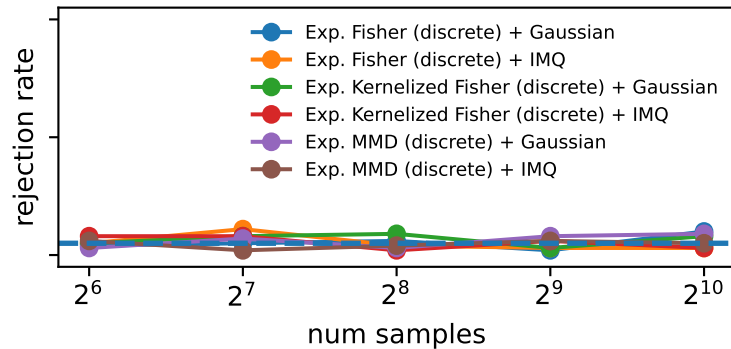

Supplement: supplementary_material [file attachment]

exact

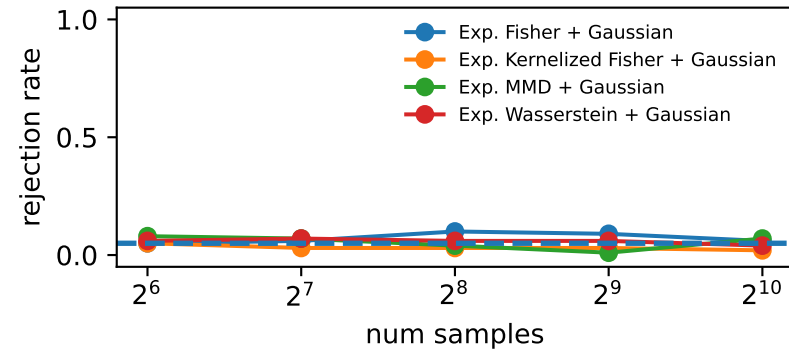

approximate

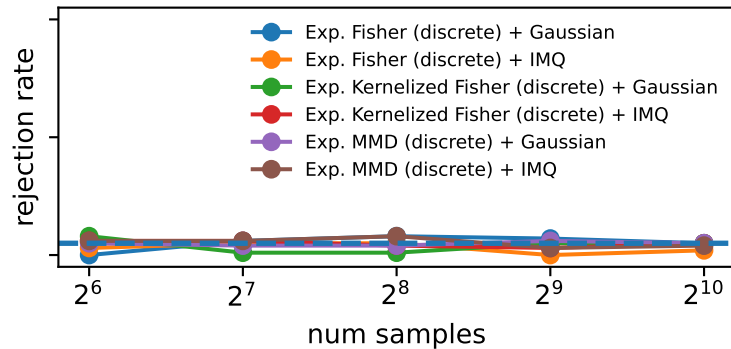

Supplement: supplementary_material [file attachment]

exact

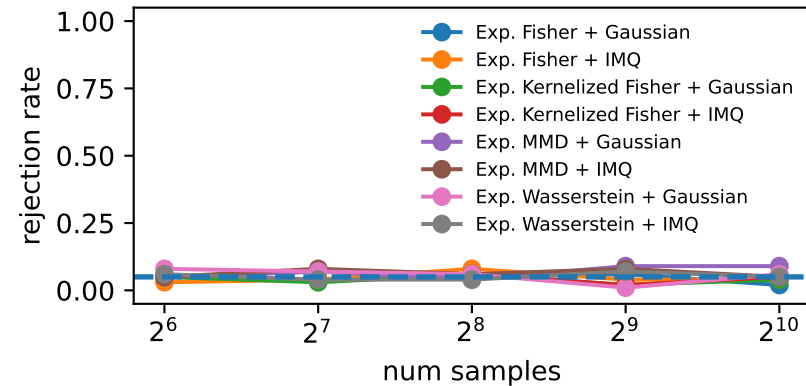

approximate

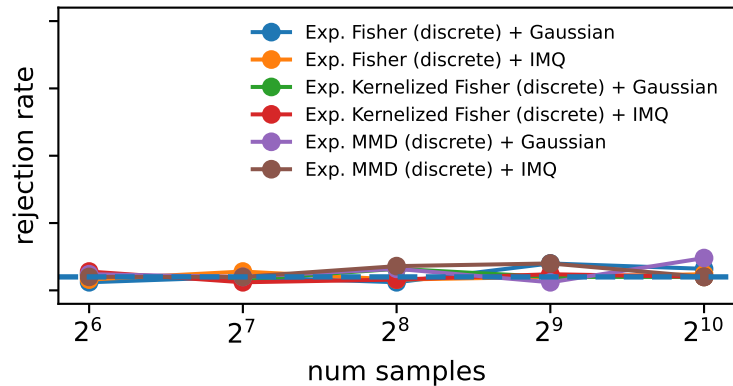

Supplement: supplementary_material [file attachment]

exact

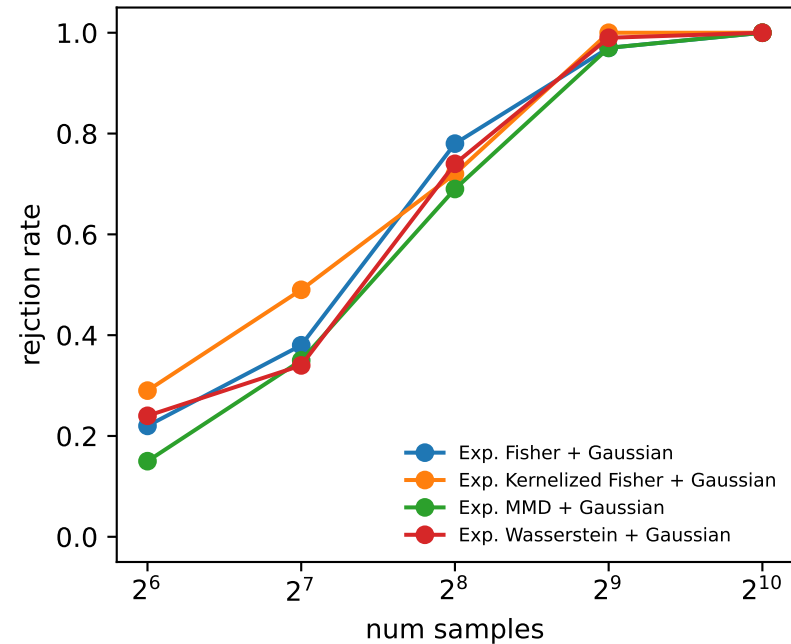

approximate

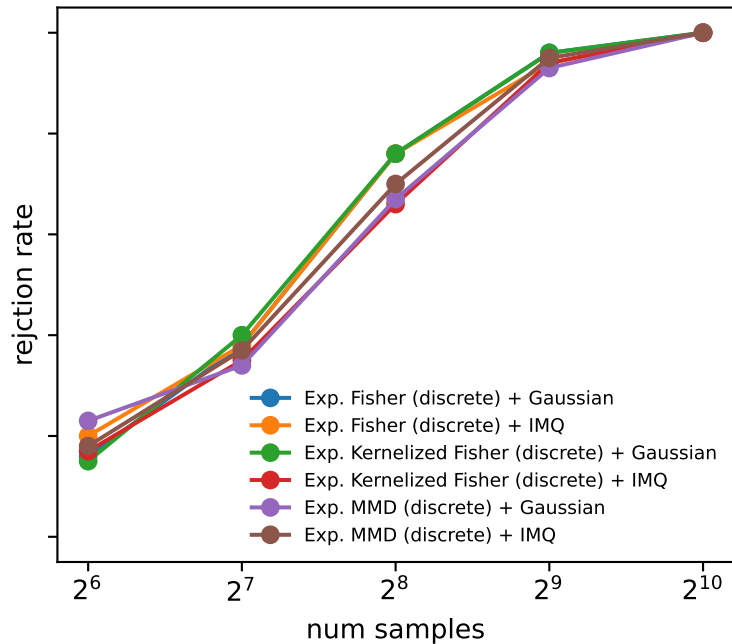

Supplement: supplementary_material [file attachment]

exact

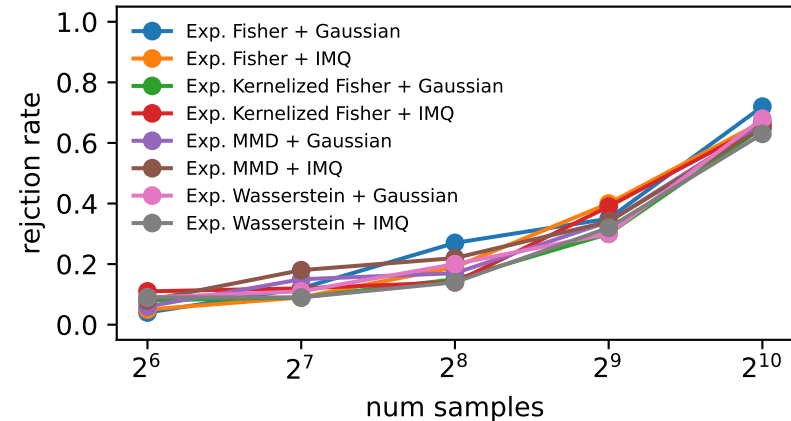

approximate

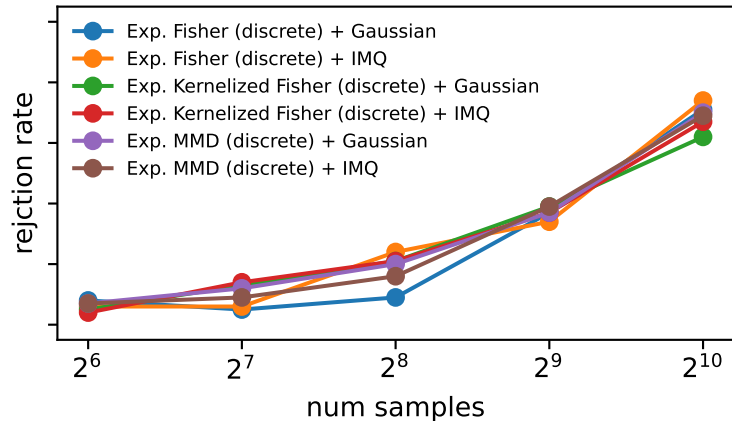

Supplement: supplementary_material [file attachment]

exact

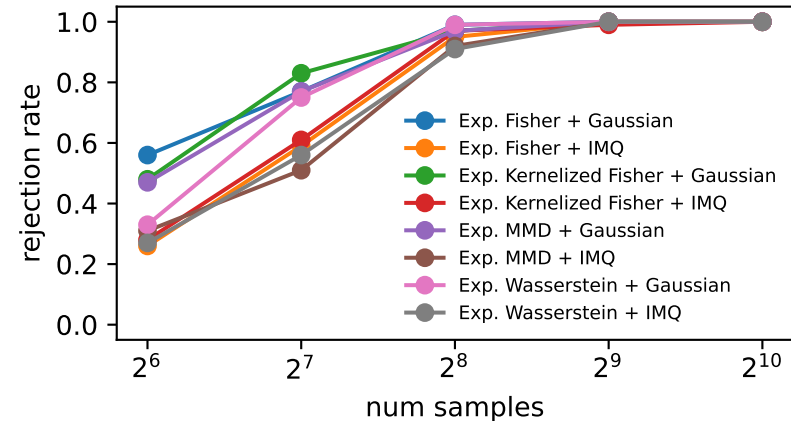

approximate

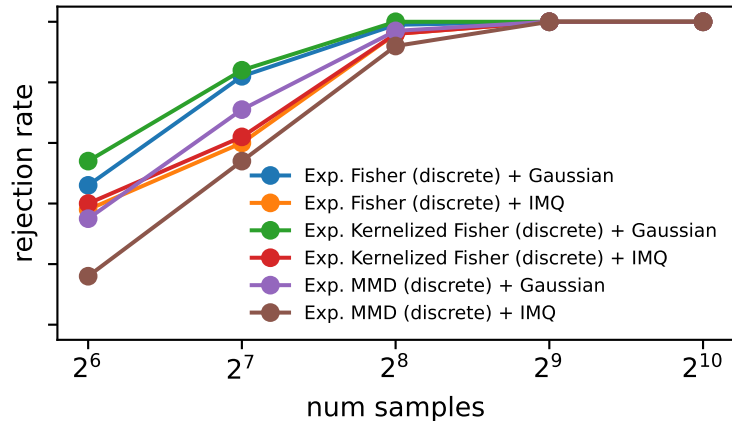

Supplement: supplementary_material [file attachment]

exact

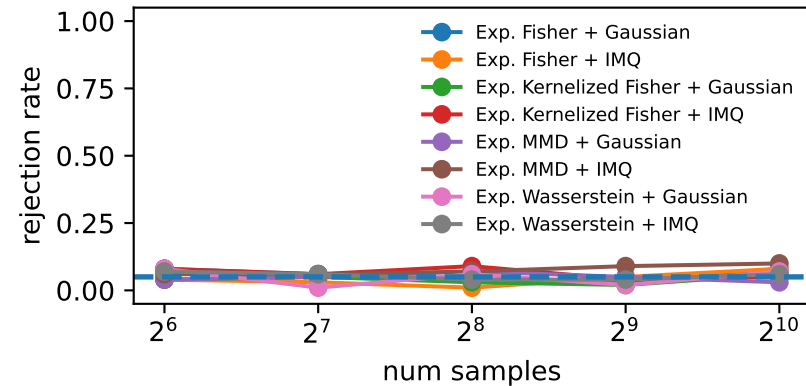

approximate

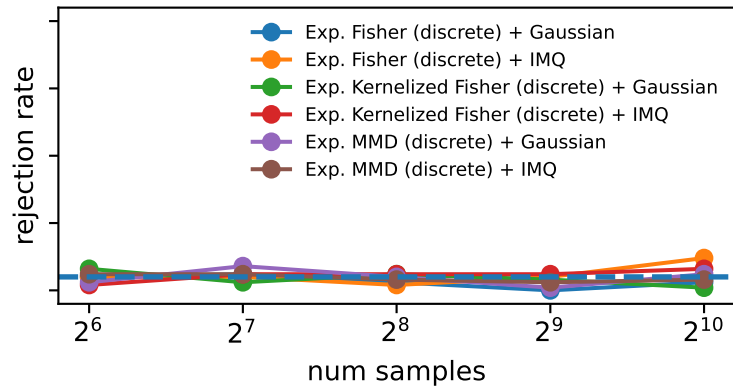

Supplement: supplementary_material [file attachment]

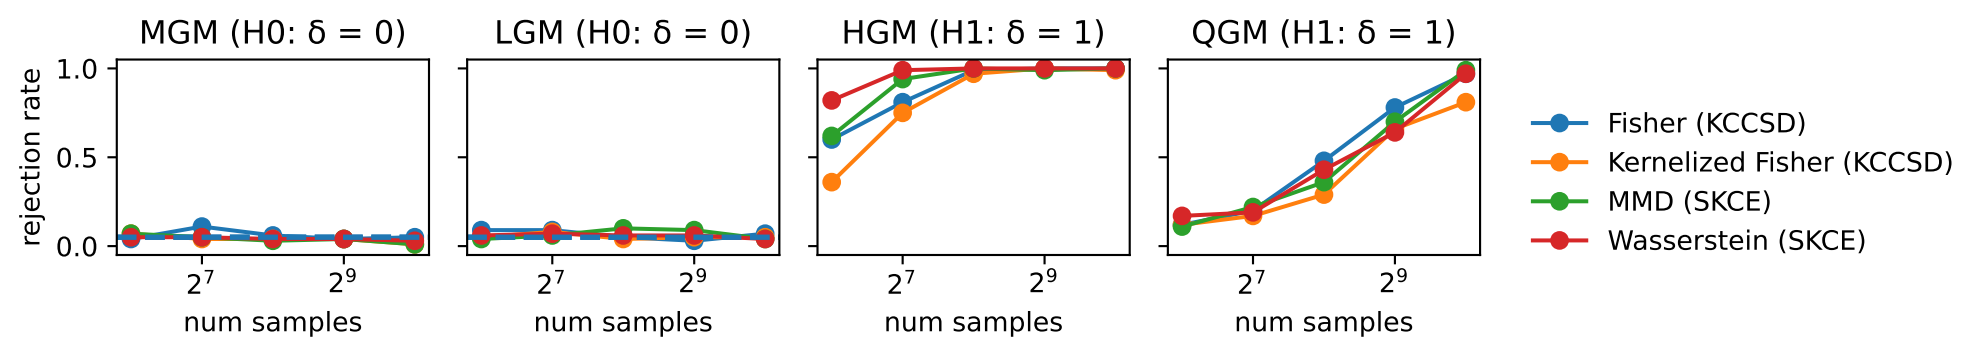

Supplement: supplementary_material [file attachment]

exact

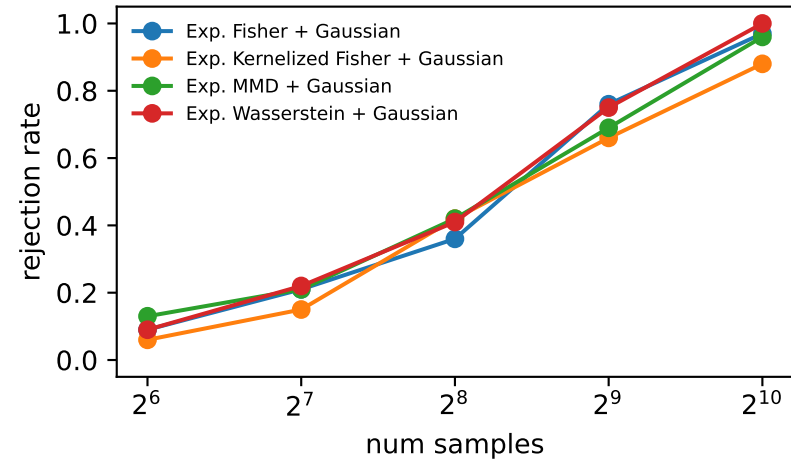

approximate

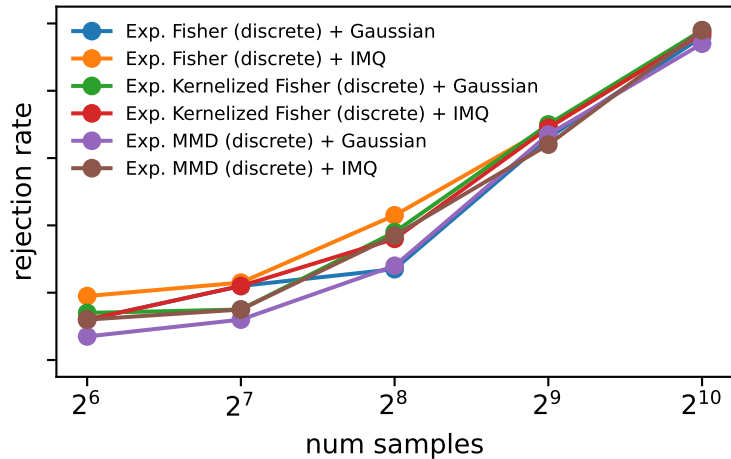

Supplement: supplementary_material [file attachment]

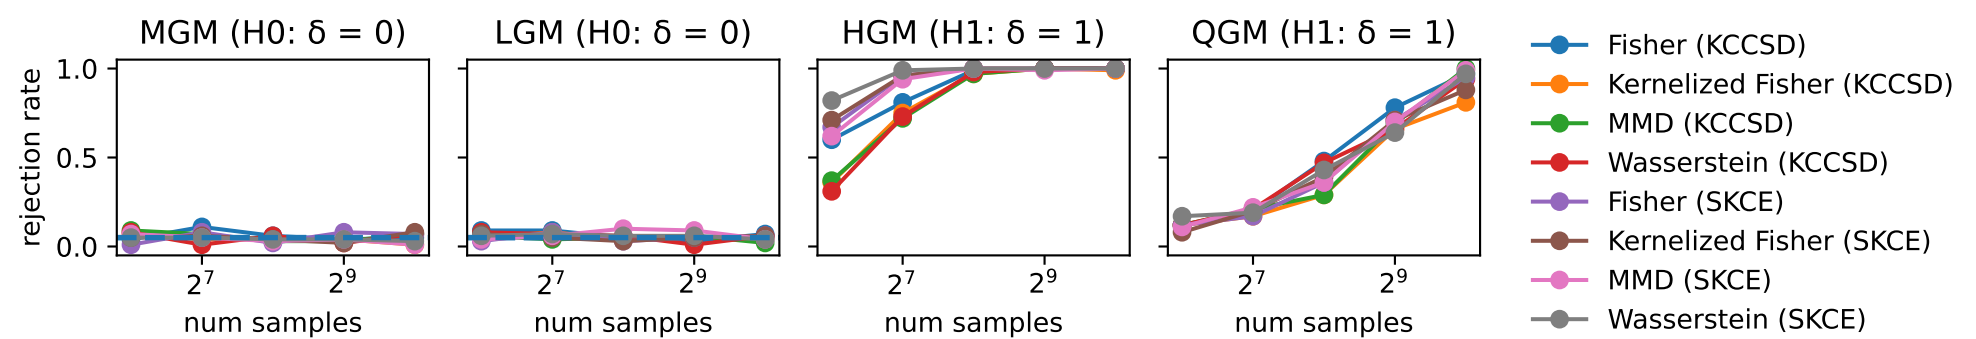

Supplement: supplementary_material [file attachment]

exact

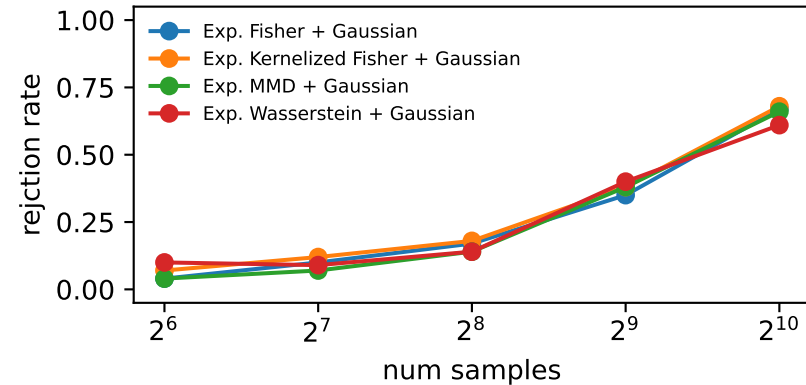

approximate

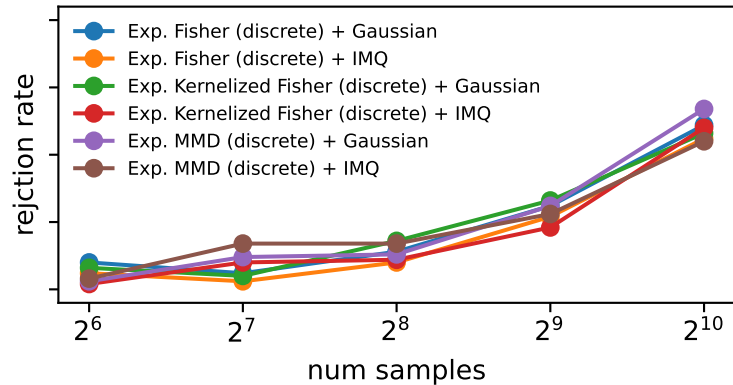

Supplement: supplementary_material [file attachment]

LGM ( $H_0: \delta = 0$ )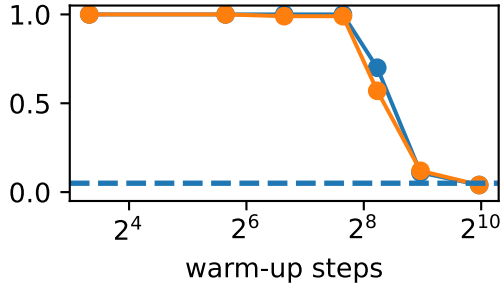HGM ( $H_0: \delta = 0$ )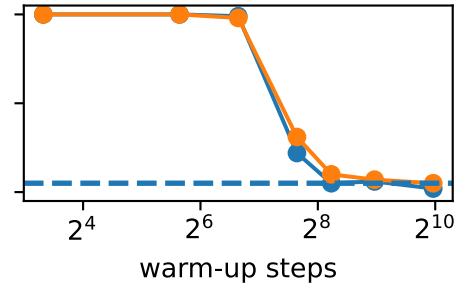QGM ( $H_0: \delta = 0$ )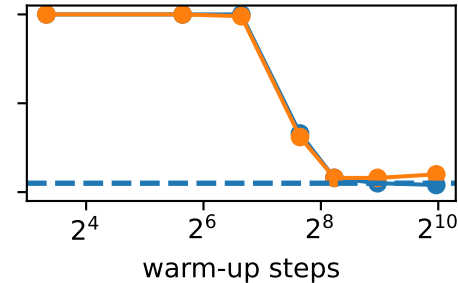

—●— Fisher (SKCE)  
—●— MMD (SKCE)

Supplement: supplementary_material [file attachment]

exact

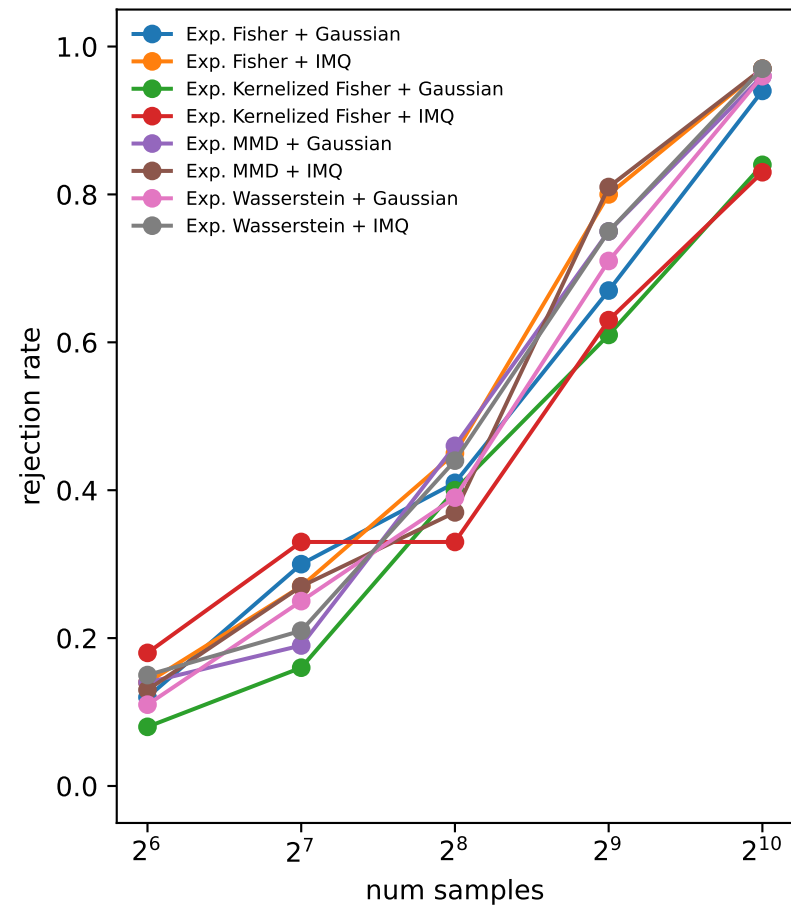

approximate

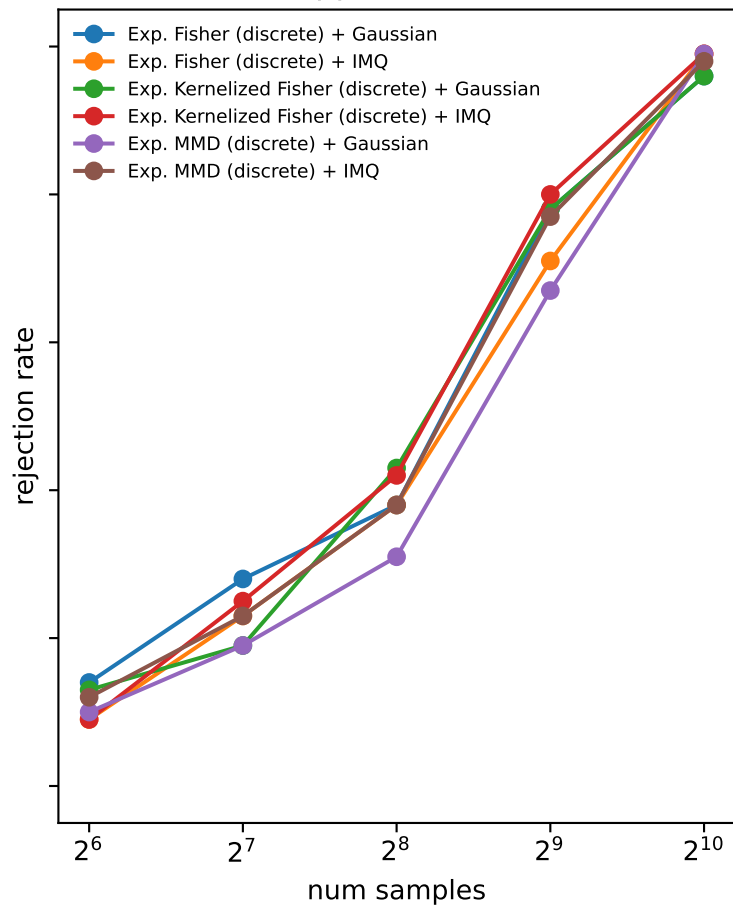

Supplement: supplementary_material [file attachment]
